# Supplementary figures and images for: Applying graph database technology for analyzing perturbed co-expression networks in cancer
Source: Oxford University Press journal article supplement (doi:10.1093/database/baaa110), 2020-01-01

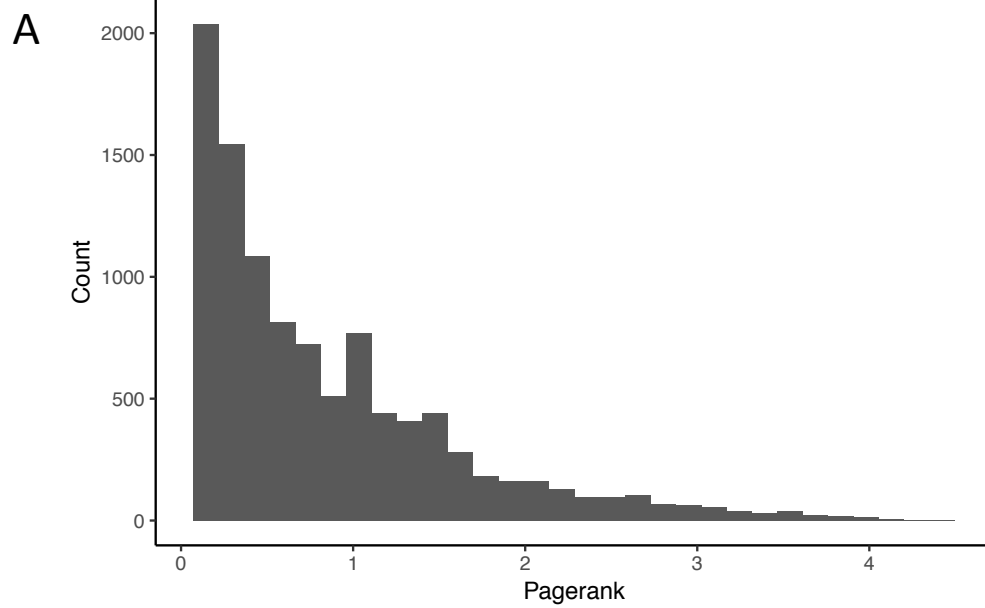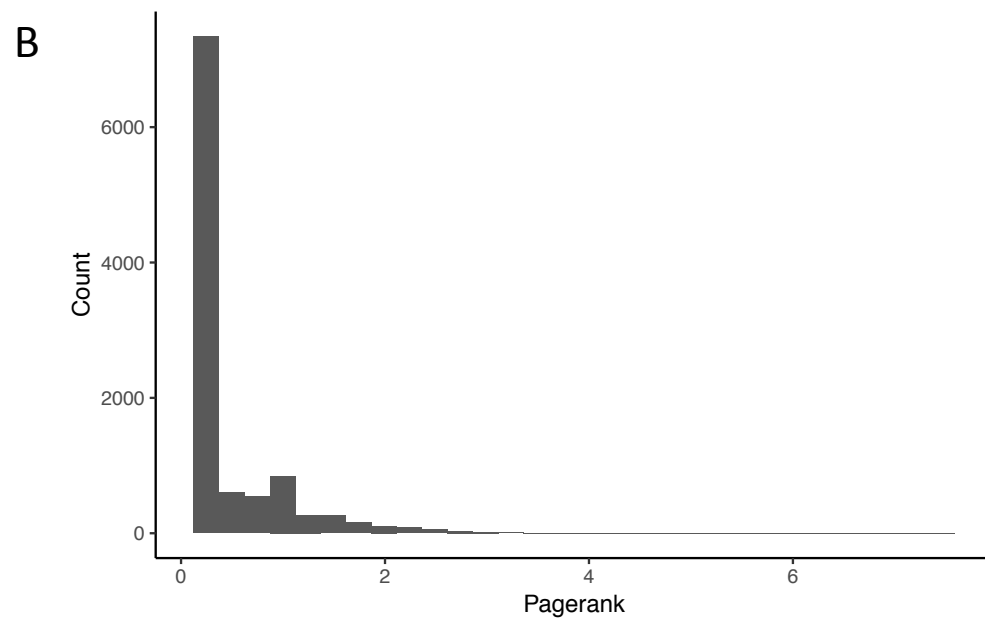

Supplement: baaa110_supp.zip [file baaa110_supp.zip]

A

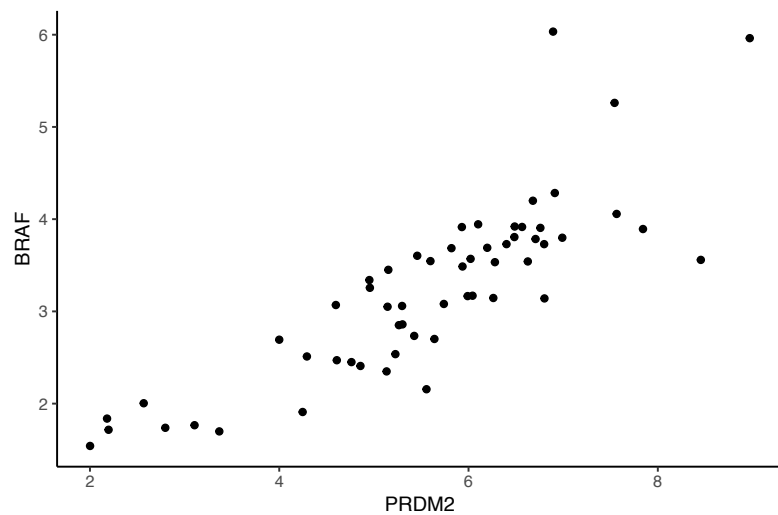

B

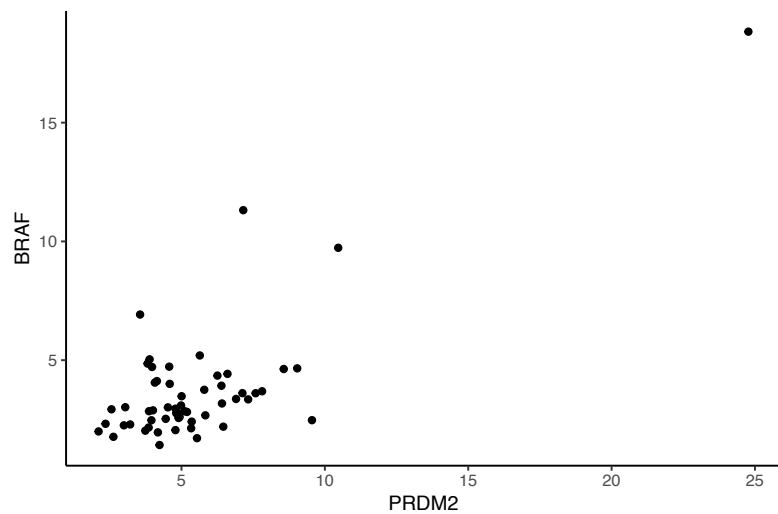

Supplement: baaa110_supp.zip [file baaa110_supp.zip]

A

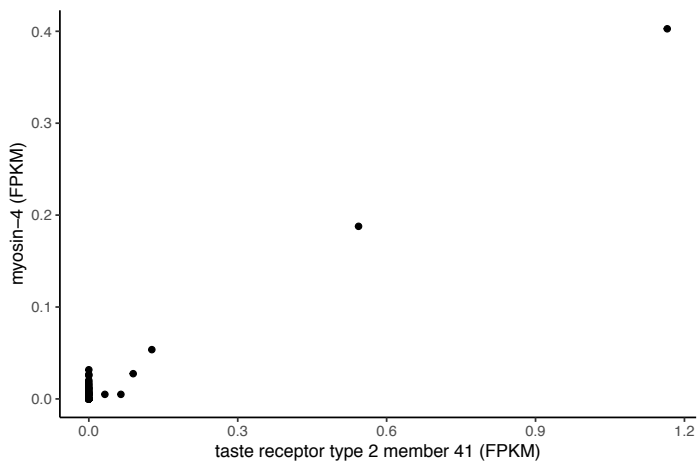

B

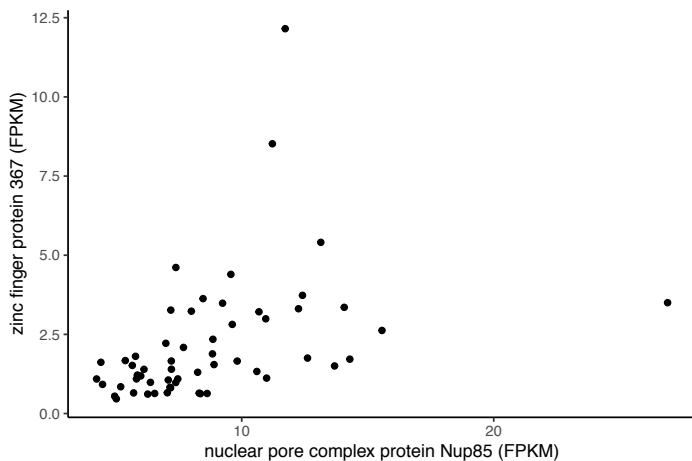

Supplement: baaa110_supp.zip [file baaa110_supp.zip]

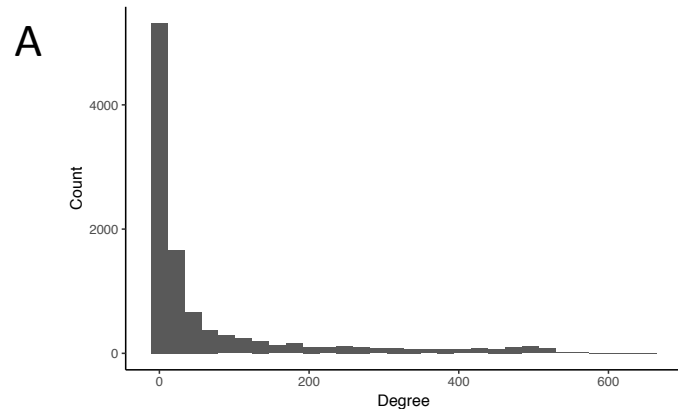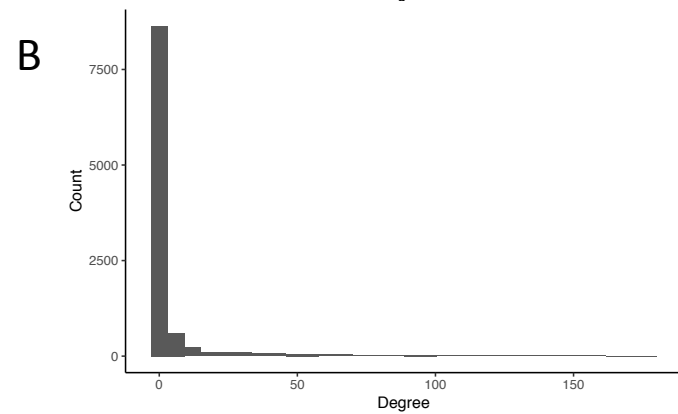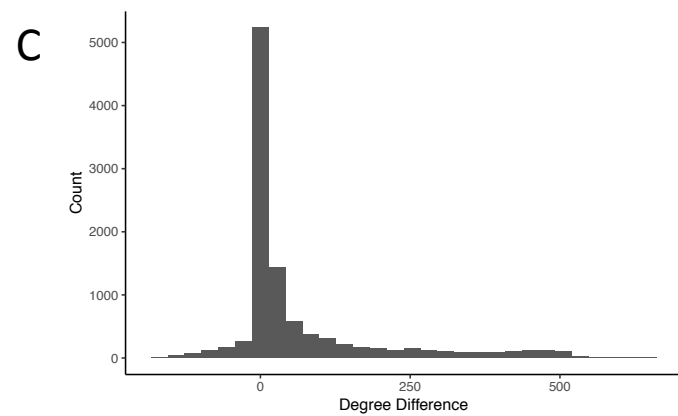

Supplement: baaa110_supp.zip [file baaa110_supp.zip]

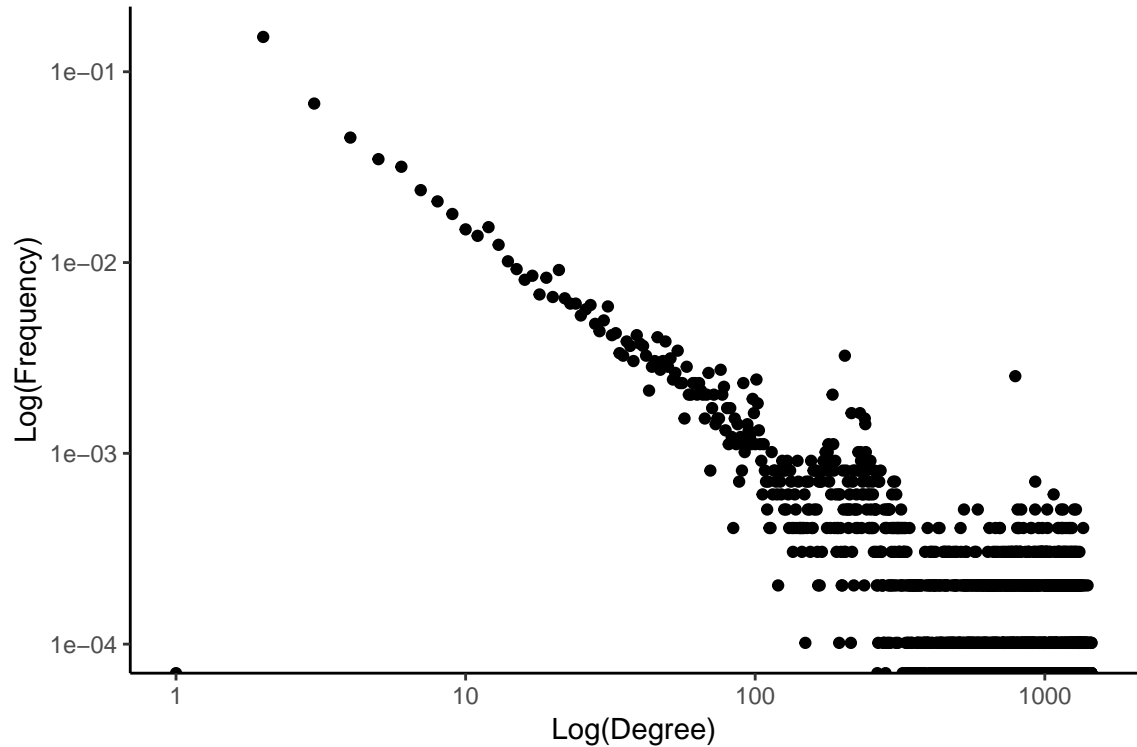

Supplement: baaa110_supp.zip [file baaa110_supp.zip]
